# Supplementary material
Source: Springer Nature journal article supplement (https://www.springermedizin.de/resource/supplementary/13048_2012_115_MOESM1_ESM.pdf/9664930)

N-Terminal

C-Terminal

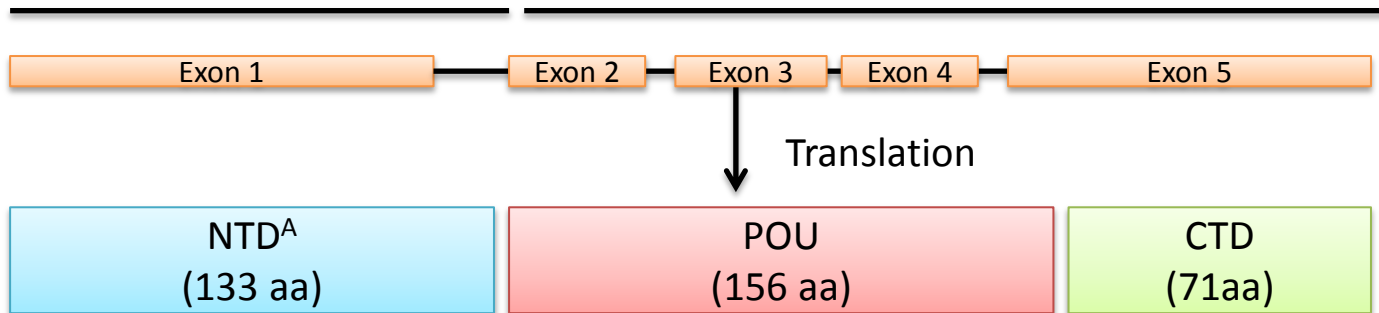

Oct4A

Differences in  
N-Terminal

C-Terminal

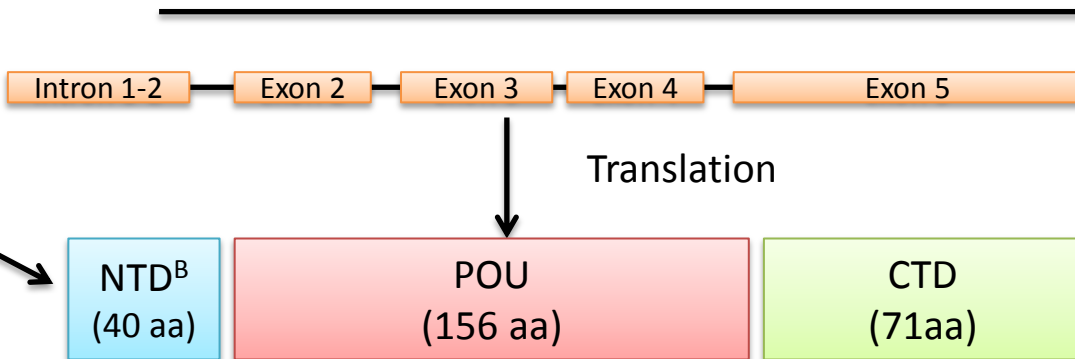

Oct4B/B1

Supplement: MOESM1 [file 9664930]
